# Supplementary material for: Looking Back to Amycolatopsis: History of the Antibiotic Discovery and Future Prospects
Source: MDPI journal article supplement (doi:10.3390/antibiotics10101254), 2021-10-15
Supplement: s1 [file s1]

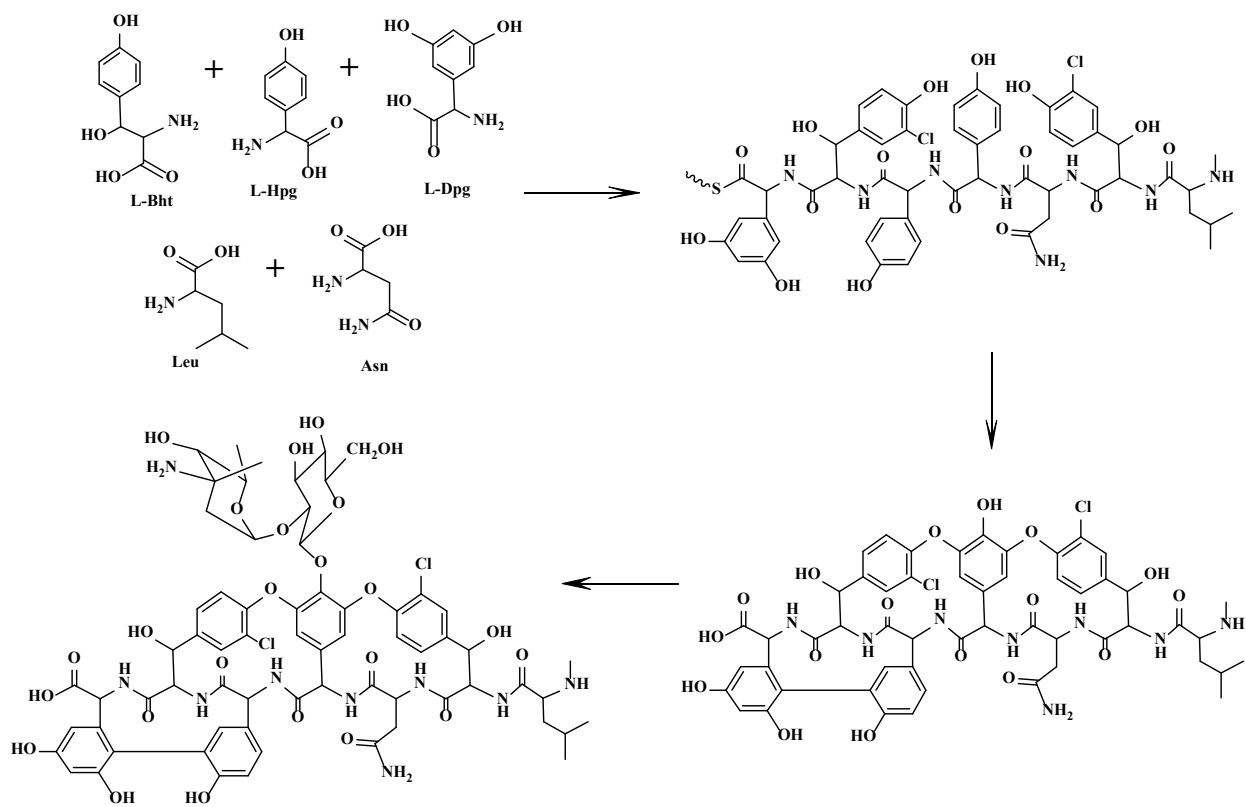

**Figure S1.** Biosynthetic pathway of vancomycin [132–134].

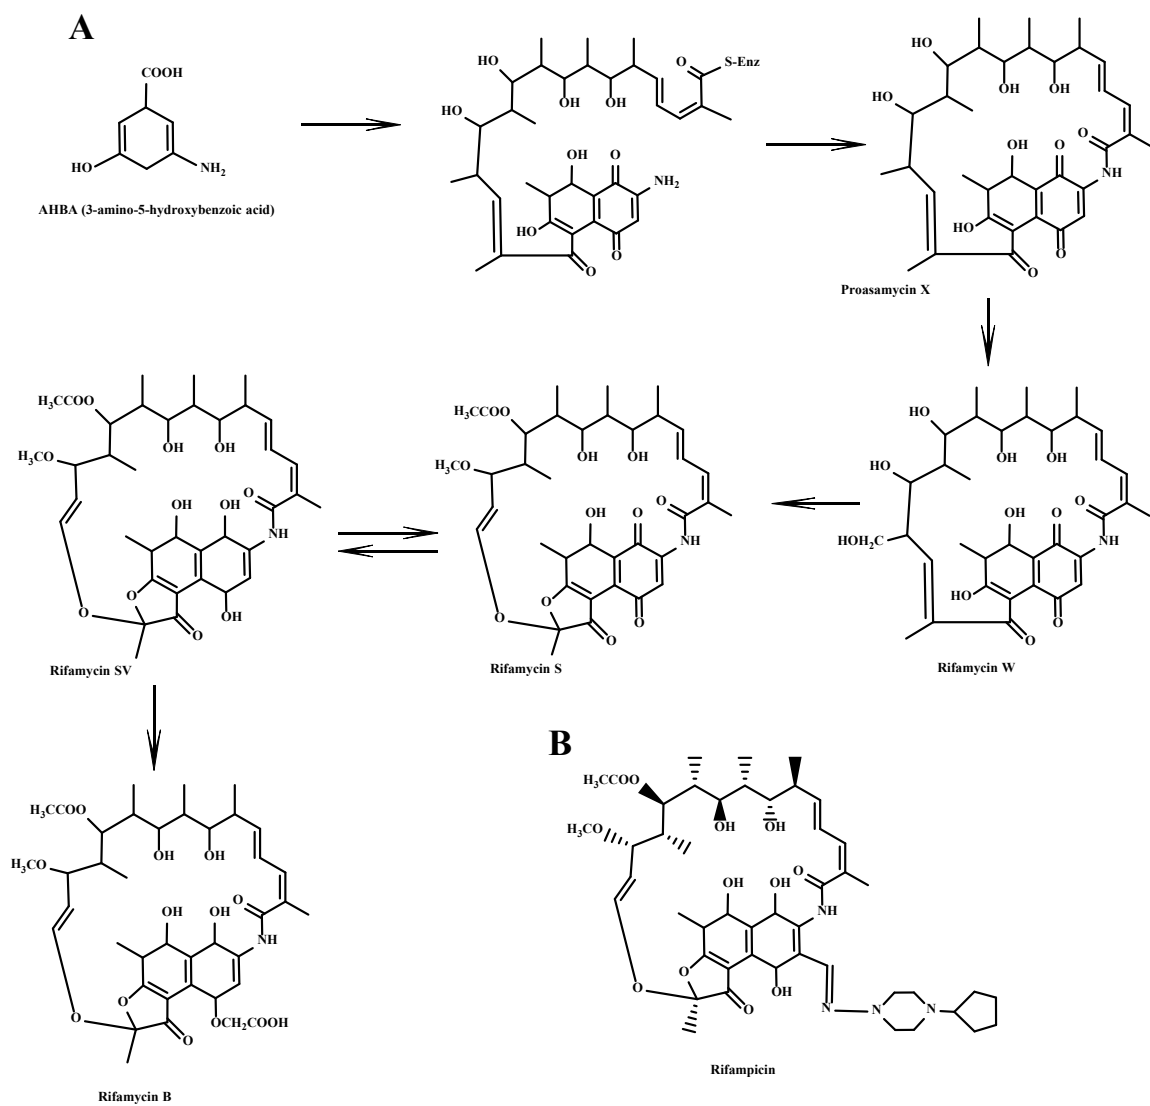

**Figure S2. (A)** Biosynthetic pathway of rifamycin B [163,164]. **(B)** Chemical structure of rifampicin.
